# Supplementary material
Source: publisher site journal article supplement (https://www.dovepress.com/article/579686)
Supplement: Supplementary file 1 [file 579686%20revised%20supplementary%20materials.pdf]

Supplementary Table 1 Search strategy used in PubMed

| Search | Query                                                                                                                                                                                                                                                                                                                                                                                                                                                                                                                                    |
|--------|------------------------------------------------------------------------------------------------------------------------------------------------------------------------------------------------------------------------------------------------------------------------------------------------------------------------------------------------------------------------------------------------------------------------------------------------------------------------------------------------------------------------------------------|
| #1     | "Acupuncture Therapy"[Mesh Terms]                                                                                                                                                                                                                                                                                                                                                                                                                                                                                                        |
| #2     | "acupuncture"[Title/Abstract] OR "electroacupuncture"[Title/Abstract] OR "warm acupuncture"[Title/Abstract] OR "moxibustion"[Title/Abstract] OR "fire needle"[Title/Abstract] OR "ankle needle"[Title/Abstract] OR "moxa"[Title/Abstract] OR "medicated moxibustion"[Title/Abstract] OR "ginger moxibustion"[Title/Abstract] OR "indirect moxibustion"[Title/Abstract] OR "medicinal thread moxibustion"[Title/Abstract] OR "point embedding"[Title/Abstract] OR "point injection"[Title/Abstract] OR "point plastering"[Title/Abstract] |
| #3     | #1 OR #2                                                                                                                                                                                                                                                                                                                                                                                                                                                                                                                                 |
| #4     | "primary dysmenorrhea"[Title/Abstract] OR "functional dysmenorrhea"[Title/Abstract] OR "spontaneous dysmenorrhea"[Title/Abstract]                                                                                                                                                                                                                                                                                                                                                                                                        |
| #5     | #3 AND #4                                                                                                                                                                                                                                                                                                                                                                                                                                                                                                                                |

Supplementary Table 2 PubMed Search Strategy for Identifying Corresponding Active Substances of Core Acupoints

| Search | Query                                                                                                                                                                                                           |
|--------|-----------------------------------------------------------------------------------------------------------------------------------------------------------------------------------------------------------------|
| #1     | Dysmenorrhea, Primary[MeSH Terms] OR Dysmenorrhea, Functional[MeSH Terms]                                                                                                                                       |
| #2     | dysmenorrhea[All Fields]                                                                                                                                                                                        |
| #3     | #1 OR #2                                                                                                                                                                                                        |
| #4     | Sanyinjiao[All Fields] OR Diji[All Fields] OR Guanyuan[All Fields] OR Ciliao[All Fields] OR Zhongji[All Fields] OR SP6[All Fields] OR SP8[All Fields] OR CV4[All Fields] OR BL32[All Fields] OR CV3[All Fields] |
| #5     | mechanism[All Fields] OR experiment[All Fields] OR molecular[All Fields]                                                                                                                                        |
| #6     | #3 AND #4                                                                                                                                                                                                       |
| #7     | #6 AND #5                                                                                                                                                                                                       |

Supplementary Table 3 General characteristics of the included articles

| Title                                                                                                                                               | First Author   | Journal                                                       | Publication Year | Therapeutic Method | Acupoint Prescription                                                                                                                                                            | Publication Language | Inclusion Status |
|-----------------------------------------------------------------------------------------------------------------------------------------------------|----------------|---------------------------------------------------------------|------------------|--------------------|----------------------------------------------------------------------------------------------------------------------------------------------------------------------------------|----------------------|------------------|
| Efficacy of Acupuncture for Primary Dysmenorrhea of Cold Coagulation and Blood Stasis Type                                                          | SHEN Deng-jin  | Inner Mongolia Journal of Traditional Chinese                 | 2023             | Acupuncture        | Qihai (CV6), Guanyuan (CV4), Sanyinjiao (SP6), Guilai (ST29), Pishu (BL20), Mingmen (GV4)                                                                                        | Chinese              | YES              |
| Clinical Observation on He's Three-way Acupuncture Combined with Ibuprofen for Primary Dysmenorrhea                                                 | HUANG Yi-yi    | Journal of Emergency in Traditional Chinese Medicine          | 2023             | Acupuncture        | Sishencong (EX-HN1), Zhongwan (CV12), Tianshu (ST25), Qihai (CV6), Guanyuan (CV4), Qichong (ST30), Hegu (LI4), Yanglingquan (GB34), Diji (SP8), Sanyinjiao (SP6), Taichong (LR3) | Chinese              | YES              |
| Efficacy of Liji Acupuncture plus Oral Chinese Medicine for Cold Coagulation and Blood Stasis Primary Dysmenorrhea and Its Effect on Hemorheology   | YE Shuang      | Chinese Journal of Traditional Medical Science and Technology | 2023             | Acupuncture        | Taibai (SP3), Zhigou (TE6)                                                                                                                                                       | Chinese              | YES              |
| Analgesic Effect of Micro-Acupuncture in the Hairline Regions of the Scalp Combined with Bone-Touching Acupuncture on Primary Dysmenorrhea          | DONG Zhen-zhen | Bachu Medical Journal                                         | 2023             | Acupuncture        | Ciliao (BL32), Diji (SP8), Sanyinjiao (SP6), Shiqizhui (EX-B8)                                                                                                                   | Chinese              | YES              |
| Clinical Study on Kidney Tonifying Method Combined with Collateral-acupoint Pain-relieving Method in the Treatment of Primary Dysmenorrhea          | DENG Yong-zhi  | Chinese Medicine Modern Distance Education of China           | 2023             | Acupuncture        | Lieque (LU7), Fenglong (ST40), Shenshu (BL23), Dachangshu (BL25), Yaoyangguan (GV3), Mingmen (GV4)                                                                               | Chinese              | YES              |
| 62 Cases of Cold Coagulation and Blood Stasis Primary Dysmenorrhea Treated by Acupuncture Combined with Ginger-separated Moxibustion on Du Meridian | WU Gui-lian    | Fujian Journal of Traditional Chinese Medicine                | 2023             | Acupuncture        | Zhongji (CV3), Shiqizhui (EX-B8), Guanyuan (CV4), Ciliao (BL32), Sanyinjiao (SP6), Diji (SP8), Guilai (ST29)                                                                     | Chinese              | YES              |
| Efficacy of Acupuncture and Moxibustion for Primary Dysmenorrhea and Patients' Pain Status                                                          | HOU Yong-lian  | MEDICINE AND HEALTH                                           | 2023             | Acupuncture        | Sanyinjiao (SP6), Taichong (LR3), Guanyuan (CV4), Zhongji (CV3), Xuehai (SP10)                                                                                                   | Chinese              | YES              |

|                                                                                                                                                                     |                |                                                                       |      |             |                                                                                                                                                             |         |     |
|---------------------------------------------------------------------------------------------------------------------------------------------------------------------|----------------|-----------------------------------------------------------------------|------|-------------|-------------------------------------------------------------------------------------------------------------------------------------------------------------|---------|-----|
| Clinical Study on Jin's Three-needle Acupuncture Therapy for the Treatment of Primary Dysmenorrhea of Cold Accumulation Causing Blood Stasis Type                   | XU Xiao-qing   | Journal of Guangzhou University of Traditional Chinese Medicine       | 2022 | Acupuncture | Qihai (CV6), Guanyuan (CV4), Guilai (ST29), Sanyinjiao (SP6), Shenshu (BL23)                                                                                | Chinese | YES |
| Evaluation of clinical efficacy of Shu-Mu-Pei acupoint combined with body acupuncture in the treatment of primary dysmenorrhea                                      | LIN Lan-ru     | Inner Mongolia Journal of Traditional Chinese Medicine                | 2022 | Acupuncture | Ganshu (BL18), Shenshu (BL23), Qihai shu (BL24), Guanyuan shu (BL26), Zusanli (ST36), Sanyinjiao (SP6)                                                      | Chinese | YES |
| Effect of Front-Mu and Back-Shu Point Acupuncture on Efficacy, Negative Emotions and Uterine Microcirculation in Primary Dysmenorrhea Patients                      | YU Xiao-pu     | The Journal of Medical Theory and Practice                            | 2022 | Acupuncture | Ciliao (BL32), Guanyuan shu (BL26), Ganshu (BL18), Shenshu (BL23), Pishu (BL20), Qihai (CV6), Sanyinjiao (SP6), Guanyuan (CV4), Zhongji (CV3), Qimen (LR14) | Chinese | YES |
| Clinical observation of Fu's Subcutaneous Needling in the treatment of primary dysmenorrhea                                                                         | LI Hai-yan     | Chinese Community Doctors                                             | 2021 | Acupuncture | Zusanli (ST36), Sanyinjiao (SP6), Hegu (LI4), Zigong (EX-CA1), Pishu (BL20)                                                                                 | Chinese | YES |
| Clinical Study on Acupuncture for Treatment of Primary Dysmenorrhea of Cold Coagulation and Blood Stasis by "Tonifying Spleen and Stomach, Regulating Ren Meridian" | CHENG Xing-min | Chinese Journal of Information on Traditional Chinese Medicine        | 2021 | Acupuncture | Zusanli (ST36), Diji (SP8), Sanyinjiao (SP6), Zhongwan (CV12), Guanyuan (CV4), Guilai (ST29)                                                                | Chinese | YES |
| Observation on the curative effect of the method of "tonifying the spleen and stomach, regulating Ren meridian" on primary dysmenorrhea with Qi-blood deficiency    | LIU Rui-ping   | Modern Journal of Integrated Traditional Chinese and Western Medicine | 2021 | Acupuncture | Zusanli (ST36), Diji (SP8), Sanyinjiao (SP6), Zhongwan (CV12), Guanyuan (CV4), Guilai (ST29)                                                                | Chinese | NO  |
| A clinical study on acupuncture combined with abdominal moxibustion in treating primary dysmenorrhea                                                                | WANG Dian-ling | Clinical Journal of Chinese Medicine                                  | 2021 | Acupuncture | Neiguan (PC6), Sanyinjiao (SP6)                                                                                                                             | Chinese | YES |
| Clinical Observation on 52 Cases of Qi Stagnation and Blood Stasis Dysmenorrhea Treated by Acupuncture plus Moving Cupping                                          | DONG Jian-ping | Heilongjiang Journal of Traditional Chinese Medicine                  | 2021 | Acupuncture | Guanyuan (CV4), Zhongji (CV3), Xuehai (SP10), Diji (SP8), Zusanli (ST36), Sanyinjiao (SP6), Ciliao (BL32), Taichong (LR3)                                   | Chinese | YES |
| Efficacy of TCM Nursing Combined with Acupuncture for Primary Dysmenorrhea                                                                                          | LI Ping        | MEDICINE AND HEALTH                                                   | 2021 | Acupuncture | Sanyinjiao (SP6), Xuehai (SP10), Zusanli (ST36)                                                                                                             | Chinese | YES |

|                                                                                                                          |               |                                                             |      |             |                                                                                                                                |         |     |
|--------------------------------------------------------------------------------------------------------------------------|---------------|-------------------------------------------------------------|------|-------------|--------------------------------------------------------------------------------------------------------------------------------|---------|-----|
| Efficacy of Acupuncture at Zusanli (ST36) for Primary Dysmenorrhea                                                       | CHANG Ke-xia  | Fertility & Health                                          | 2021 | Acupuncture | Zusanli (ST36), Guanyuan (CV4), Zhibian (BL54), Qihai (CV6), Shangliao (BL31), Ciliao (BL32), Zhongliao (BL33), Xialiao (BL34) | Chinese | YES |
| Therapeutic Effects of Sequential-acupuncture Therapy on Pain and Anxiety of Patients with Primary Dysmenorrhea          | SUN Ting      | Journal of Zhejiang Chinese Medical University              | 2021 | Acupuncture | Guanyuan (CV4), Sanyinjiao (SP6), Diji (SP8)                                                                                   | Chinese | YES |
| Clinical Observation on Acupuncture Based on Midnight-Noon Ebb-Flow and Meridian Stems-Branches for Primary Dysmenorrhea | CHEN Qiong    | Journal of Practical Traditional Chinese Medicine           | 2021 | Acupuncture | Guanyuan (CV4), Ququan (LR8), Diji (SP8), Yingu (KI10)                                                                         | Chinese | YES |
| Clinical Study on Catgut Embedding at Front-Mu and Back-Shu Points for 30 Cases of Primary Dysmenorrhea                  | ZHANG Hui     | Jiangsu Journal of Traditional Chinese Medicine             | 2020 | Acupuncture | Ciliao (BL32), Hegu (LI4), Guanyuan (CV4), Zigong (EX-CA1), Sanyinjiao (SP6), Pishu (BL20)                                     | Chinese | YES |
| Influence of Multi-point Acupuncture at Different Timings on Primary Dysmenorrhea                                        | YE Xiao-na    | Journal of External Therapy of Traditional Chinese Medicine | 2020 | Acupuncture | Diji (SP8), Sanyinjiao (SP6), Shiqizhui (EX-B8), Ciliao (BL32)                                                                 | Chinese | NO  |
| Clinical observation of abdominal acupuncture for primary dysmenorrhea by stages                                         | YUAN Hong-wei | Chinese Journal of Family Planning & Gynecotokology         | 2020 | Acupuncture | Zhongwan (CV12), Xiawan (CV10), Qihai (CV6), Guanyuan (CV4)                                                                    | Chinese | YES |
| Clinical Observation on Huoxue Huayu Xingqi Decoction for Qi Stagnation and Blood Stasis Primary Dysmenorrhea            | CHANG Li-hua  | Journal of Practical Traditional Chinese Medicine           | 2020 | Acupuncture | Sanyinjiao (SP6), Diji (SP8), Yinlingquan (SP9)                                                                                | Chinese | YES |
| Clinical Study on Wuji Baifeng Pill Combined with Acupuncture for Primary Dysmenorrhea                                   | MA Lin-xiang  | New Chinese Medicine                                        | 2020 | Acupuncture | Qihai (CV6), Guanyuan (CV4), Xuchai (SP10), Zusanli (ST36), Sanyinjiao (SP6), Shiqizhui (EX-B8), Ciliao (BL32)                 | Chinese | YES |

|                                                                                                                                                                   |                |                                                                |      |             |                                                                                                                                                                                |         |     |
|-------------------------------------------------------------------------------------------------------------------------------------------------------------------|----------------|----------------------------------------------------------------|------|-------------|--------------------------------------------------------------------------------------------------------------------------------------------------------------------------------|---------|-----|
| Effects of Acupuncture with Back-Shu and Front-Mu Acupoint Grouping on PGF2 $\alpha$ , $\beta$ -EP and Uterine Artery Blood Flow in Primary Dysmenorrhea Patients | GUO Jian-fang  | Shanghai Journal of Acupuncture and Moxibustion                | 2020 | Acupuncture | Ganshu (BL18), Shenshu (BL23), Qihai shu (BL24), Guanyuan shu (BL26), Ciliao (BL32), Qimen (LR14), Guanyuan (CV4), Zhongji (CV3), Qihai (CV6), Sanyinjiao (SP6)                | Chinese | YES |
| 31 Cases of Primary Dysmenorrhea Treated by Zhibian (BL54) Penetrating Shuidao (ST28) Acupuncture                                                                 | WANG Hai-jun   | Chinese Acupuncture & Moxibustion                              | 2019 | Acupuncture | Zhibian (BL54), Shuidao (ST28), Hegu (LI4), Taichong (LR3), Ciliao (BL32)                                                                                                      | Chinese | YES |
| Clinical Observation on Zhibian Penetrating Shuidao Method for Primary Dysmenorrhea                                                                               | WANG Hai-jun   | Chinese Journal of Integrated Traditional and Western Medicine | 2019 | Acupuncture | Zhibian (BL54), Shuidao (ST28), Hegu (LI4), Taichong (LR3), Ciliao (BL32)                                                                                                      | Chinese | NO  |
| Immediate and Long-term Analgesic Effect of Baliao Points Daoqi Method in Treating Primary Dysmenorrhea                                                           | WEI Yan-hong   | Acta Chinese Medicine                                          | 2019 | Acupuncture | Shangliao (BL31), Ciliao (BL32), Zhongliao (BL33), Xialiao (BL34)                                                                                                              | Chinese | YES |
| Clinical Nursing Observation on Dan'ai Dysmenorrhea Plaster plus Warm Acupuncture for Cold Coagulation and Blood Stasis Primary Dysmenorrhea                      | ZHAO Mei       | Electronic Journal of Practical Clinical Nursing Science       | 2019 | Acupuncture | Shiqizhui (EX-B8), Dijì (SP8), Ciliao (BL32), Sanyinjiao (SP6)                                                                                                                 | Chinese | NO  |
| Therapeutic Observation of Herb-partitioned Moxibustion at Umbilicus plus Abdominal Acupuncture for Primary Dysmenorrhea                                          | GAO Xue-jing   | Shanghai Journal of Acupuncture and Moxibustion                | 2019 | Acupuncture | Guanyuan (CV4), Qihai (CV6), Zigong (EX-CA1), Sanyinjiao (SP6), Xuehai (SP10)                                                                                                  | Chinese | YES |
| The efficacy of Liji acupuncture on primary dysmenorrhea of cold-damp coagulation type and its improvement on the life quality                                    | ZHAO Ming-feng | Guangdong Medical Journal                                      | 2019 | Acupuncture | Taibai (SP3), Zhigou (TE6)                                                                                                                                                     | Chinese | NO  |
| Efficacy of Eight Methods of Intelligent Turtle for Primary Dysmenorrhea                                                                                          | LEI Jiang      | Inner Mongolia Journal of Traditional Chinese Medicine         | 2019 | Acupuncture | Zhongji (CV3), Qihai (CV6), Guanyuan (CV4), Sanyinjiao (SP6), Geshu (BL17), Pishu (BL20), Ganshu (BL18), Shenshu (BL23), Taichong (LR3), Dijì (SP8), Qugu (CV2), Ciliao (BL32) | Chinese | YES |
| Moxa Cone Moxibustion Combined with Acupuncture for Cold Stasis Dysmenorrhea                                                                                      | CHEN Zhou-yang | Electronic Journal of Clinical Medical Literature              | 2019 | Acupuncture | Sanyinjiao (SP6), Guanyuan (CV4), Zhongji (CV3), Shuidao (ST28), Guilai (ST29)                                                                                                 | Chinese | YES |

|                                                                                                                                                           |               |                                                             |      |             |                                                                                                                                                            |         |     |
|-----------------------------------------------------------------------------------------------------------------------------------------------------------|---------------|-------------------------------------------------------------|------|-------------|------------------------------------------------------------------------------------------------------------------------------------------------------------|---------|-----|
| Efficacy of Wenjing Shugan Huayu Tongluo Decoction plus Acupuncture for Primary Dysmenorrhea                                                              | JIN Wang      | Electronic Journal of Practical Gynecological Endocrinology | 2019 | Acupuncture | Zhongdou(LR6), Sanyinjiao (SP6), Diji (SP8), Taichong (LR3), Hegu (LI4)                                                                                    | Chinese | YES |
| Clinical Study on WenTong Acupuncture Method Therapy for Primary Dysmenorrhea with HanNingXueYue Syndrome                                                 | DAI Shun-hua  | World Latest Medicine Information                           | 2019 | Acupuncture | Tianshu (ST25), Shuidao (ST28), Guilai (ST29), Sanyinjiao (SP6), Zusanli (ST36), Taichong (LR3), Ciliao (BL32), Zhongji (CV3), Qihai (CV6), Guanyuan (CV4) | Chinese | YES |
| Observation on treating primary dysmenorrhea of the Hanshi Ningzhi type by warm acupuncture at BL32                                                       | LIU Xing-ping | Clinical Journal of Chinese Medicine                        | 2019 | Acupuncture | Guanyuan (CV4), Sanyinjiao (SP6), Diji (SP8), Shiqizhui (EX-B8), Shuidao (ST28)                                                                            | Chinese | YES |
| Efficacy of Acupuncture and Moxibustion for Primary Dysmenorrhea                                                                                          | ZHU Jun-li    | Journal of Guangxi University of Chinese Medicine           | 2019 | Acupuncture | Guanyuan (CV4), Sanyinjiao (SP6), Qihai (CV6), Zusanli (ST36), Ciliao (BL32), Chengshan (BL57)                                                             | Chinese | YES |
| Clinical observation on treating primary dysmenorrhea by acupuncture                                                                                      | GU Wen-ying   | Clinical Journal of Chinese Medicine                        | 2019 | Acupuncture | Zusanli (ST36), Diji (SP8), Sanyinjiao (SP6), Zhongji (CV3), Guanyuan (CV4), Taichong (LR3)                                                                | Chinese | YES |
| Study on Effect of ZiwuLiuzhu Combined with Expression of Meridians of Heavenly Stems and Earthly Branches in the Treatment of Primary Dysmenorrhea       | DENG Hai-shan | Liaoning Journal of Traditional Chinese Medicine            | 2018 | Acupuncture | Guanyuan (CV4), Ququan (LR8), Diji (SP8), Yingu (KI10), Hegu (LI4), Taichong (LR3)                                                                         | Chinese | YES |
| 20 Cases of Primary Dysmenorrhea Treated by Abdominal Acupuncture                                                                                         | WANG Li-na    | Journal of External Therapy of Traditional Chinese Medicine | 2018 | Acupuncture | Zhongwan (CV12), Xiawan (CV10), Qihai (CV6), Guanyuan (CV4), Huaroumen (ST24), Wailing (ST26), Zigong (EX-CA1)                                             | Chinese | YES |
| Acupuncture Treatment of Primary Dysmenorrhea by Needling Acupoints of the Spleen Meridian with Positive Reactions:A Randomized Controlled Clinical Trial | SUN Yi-ni     | Acupuncture Research                                        | 2018 | Acupuncture | Sanyinjiao (SP6), Diji (SP8), Yinlingquan (SP9)                                                                                                            | Chinese | NO  |

|                                                                                                                                                                    |                |                                                                                       |      |             |                                                                                                                                 |         |     |
|--------------------------------------------------------------------------------------------------------------------------------------------------------------------|----------------|---------------------------------------------------------------------------------------|------|-------------|---------------------------------------------------------------------------------------------------------------------------------|---------|-----|
| Long Term Effects Observation on Acupuncture of Liji Therapy for Primary Dysmenorrhea of Cold-damp Stagnation Type                                                 | ZHAO Ming-feng | Modernization of Traditional Chinese Medicine and Medica-World Science and Technology | 2018 | Acupuncture | Taibai (SP3), Zhigou (TE6)                                                                                                      | Chinese | NO  |
| 48 Cases of Cold Coagulation and Blood Stasis Primary Dysmenorrhea Treated by Warm Unblocking Acupuncture plus Shaofu Zhuyu Decoction                              | SHEN Hai-jun   | Traditional Chinese Medicinal Research                                                | 2018 | Acupuncture | Hegu (LI4), Sanyinjiao (SP6), Diji (SP8), Taichong (LR3)                                                                        | Chinese | NO  |
| Clinical efficacy of Zhou's"collateral acupoint analgesic prescription"plus Diji and Qichong points on primary dysmenorrhea with dampness and phlegm-reducing type | ZHAO Yin       | Journal of Hebei Traditional Chinese Medicine and Pharmacology                        | 2018 | Acupuncture | Lieque (LU7), Fenglong (ST40), Ligou (LR5), Qichong (ST30), Diji (SP8)                                                          | Chinese | YES |
| Clinical Randomized Parallel Contrast Study on Primary Dysmenorrhea Treated with Medicine Moxibustion combined with Abdomen Acupuncture                            | AN Ying-cheng  | Journal of Practical Traditional Chinese Internal Medicine                            | 2017 | Acupuncture | Zhongji (CV3), Guanyuan (CV4), Shenque (CV8), Wailing (ST26), Shuidao (ST28), Dahe (KI12), Daheng (SP15)                        | Chinese | YES |
| Effective observation on treating 84 cases of primary dysmenorrhea by acupuncture                                                                                  | LIU A-qing     | Clinical Journal of Chinese Medicine                                                  | 2017 | Acupuncture | Qihai (CV6), Guanyuan (CV4), Sanyinjiao (SP6), Diji (SP8), Yinlingquan (SP9)                                                    | Chinese | YES |
| Clinical Observation on Golden Rooster Pecking Method for Qi and Blood Deficiency Syndrome of Primary Dysmenorrhea                                                 | WANG Xu-guang  | New Chinese Medicine                                                                  | 2017 | Acupuncture | Guanyuan (CV4), Qihai (CV6), Zhongji (CV3), Zigong (EX-CA1), Zusanli (ST36), Sanyinjiao (SP6), Shiqizhui (EX-B8), Ciliao (BL32) | Chinese | YES |
| Analgesic Effect of Qi-inducing Origin-Returning Method plus Body Acupuncture in Acute Primary Dysmenorrhea                                                        | DU Er-yan      | Journal of Sichuan of Traditional Chinese Medicine                                    | 2017 | Acupuncture | Zhongwan (CV12), Guanyuan (CV4), Qihai (CV6), Zhongji (CV3), Guilai (ST29), Sanyinjiao (SP6)                                    | Chinese | YES |
| Screening of Optimal Acupuncture and Moxibustion Regimen for Primary Dysmenorrhea                                                                                  | QIAO Li        | Journal of External Therapy of Traditional Chinese Medicine                           | 2017 | Acupuncture | Guanyuan (CV4), Diji (SP8), Sanyinjiao (SP6), Shiqizhui (EX-B8)                                                                 | Chinese | YES |

|                                                                                                                                                                     |                |                                                        |      |             |                                                                                                                                                |         |     |
|---------------------------------------------------------------------------------------------------------------------------------------------------------------------|----------------|--------------------------------------------------------|------|-------------|------------------------------------------------------------------------------------------------------------------------------------------------|---------|-----|
| Clinical Study on Acupuncture and Moxibustion for Primary Dysmenorrhea                                                                                              | LI Cui-ping    | World Journal of Clinical Medicine                     | 2016 | Acupuncture | Sanyinjiao (SP6), Ciliao (BL32), Guanyuan (CV4), Zigong (EX-CA1), Hegu (LI4), Geshu (BL17), Xuehai (SP10)                                      | Chinese | YES |
| Therapeutic Observation of LU's Warm Needling Therapy for Primary Dysmenorrhea                                                                                      | JIN Zhu-xuan   | Shanghai Journal of Acupuncture and Moxibustion        | 2016 | Acupuncture | Guanyuan (CV4), Sanyinjiao (SP6), Pishu (BL20), Shenshu (BL23)                                                                                 | Chinese | YES |
| Observation on 120 Cases of Primary Dysmenorrhea Treated by Acupuncture and Moxibustion                                                                             | LIU Xiao-wei   | Journal of Practical Traditional Chinese Medicine      | 2016 | Acupuncture | Guanyuan (CV4), Zhongji (CV3), Zigong (EX-CA1), Sanyinjiao (SP6), Zusanli (ST36), Taichong (LR3), Shenque (CV8), Yinlingquan (SP9)             | Chinese | YES |
| Treating 60 cases of Yangxu Han'ning type of primary dysmenorrhea by the Rebuzhen therapy of Zheng's                                                                | LI Guang-qi    | Clinical Journal of Chinese Medicine                   | 2016 | Acupuncture | Guanyuan (CV4), Shuidao (ST28), Sanyinjiao (SP6), Ciliao (BL32), Dijii (SP8), Yaoyangguan (GV3), Shenshu (BL23), Pishu (BL20), Zigong (EX-CA1) | Chinese | YES |
| Effect of Group Acupuncture at Different Intervention Timings on TCM Syndrome Scores in Primary Dysmenorrhea Patients                                               | XIE Chang-bi   | Journal of Frontiers of Medicine                       | 2016 | Acupuncture | Shiqizhui (EX-B8), Ciliao (BL32), Dijii (SP8), Sanyinjiao (SP6)                                                                                | Chinese | NO  |
| Clinical studies on different acupuncture time for primary dysmenorrhea                                                                                             | XUE Xiao       | Journal of Acupuncture and Tuina Science               | 2016 | Acupuncture | Guanyuan (CV4), Zusanli (ST36), Sanyinjiao (SP6)                                                                                               | English | YES |
| Clinical Efficacy of Bee Acupuncture for Primary Dysmenorrhea                                                                                                       | JIAO Chun-yuan | China Health Care & Nutrition                          | 2016 | Acupuncture | Zusanli (ST36), Ganshu (BL18), Ciliao (BL32), Pishu (BL20), Shenshu (BL23)                                                                     | Chinese | YES |
| Study on the Functional Regions of Acupuncture Treatment for Primary Dysmenorrhea in Brain by the Technology of Resting-state Functional Magnetic Resonance Imaging | SU Cheng-guo   | Journal of Sichuan of Traditional Chinese Medicine     | 2016 | Acupuncture | Sanyinjiao (SP6), Dijii (SP8)                                                                                                                  | Chinese | YES |
| Clinical Efficacy of Balance Acupuncture for 43 Cases of Primary Dysmenorrhea                                                                                       | SUN Yan-yi     | Inner Mongolia Journal of Traditional Chinese Medicine | 2016 | Acupuncture | Tanzhong (CV17), Yanglingquan (GB34)                                                                                                           | Chinese | YES |

|                                                                                                                                            |                |                                                                         |      |             |                                                                                                                                                                               |         |     |
|--------------------------------------------------------------------------------------------------------------------------------------------|----------------|-------------------------------------------------------------------------|------|-------------|-------------------------------------------------------------------------------------------------------------------------------------------------------------------------------|---------|-----|
| Efficacy of Floating Acupuncture for Dysmenorrhea                                                                                          | TIAN Chun-hong | The Medical Forum                                                       | 2016 | Acupuncture | Sanyinjiao (SP6), Ciliao (BL32), Shiqizhui (EX-B8), Diji (SP8)                                                                                                                | Chinese | NO  |
| Randomized Controlled Study on Warm-promotion Needling for Treatment of Cold Coagulation and Blood Stasis of Primary Dysmenorrhea          | SUN Run-jie    | Chinese Journal of Information on Traditional Chinese Medicine          | 2016 | Acupuncture | Guanyuan (CV4), Sanyinjiao (SP6), Shiqizhui (EX-B8), Diji (SP8), Ciliao (BL32), Hegu (LI4), Taichong (LR3)                                                                    | Chinese | YES |
| Therapeutic Observation of Acupuncture at Back-Shu and Front-Mu Points in Treating Primary Dysmenorrhea                                    | GUO Jian-fang  | Shanghai Journal of Acupuncture and Moxibustion                         | 2016 | Acupuncture | Ganshu (BL18), Pishu (BL20), Shenshu (BL23), Qihai shu (BL24), Guanyuan shu (BL26), Ciliao (BL32), Qimen (LR14), Zhongji (CV3), Guanyuan (CV4), Qihai (CV6), Sanyinjiao (SP6) | Chinese | YES |
| Efficacy of Acupuncture at Jimai (LR14) for Primary Dysmenorrhea in Adolescent Athletes                                                    | HU Wen         | New Chinese Medicine                                                    | 2016 | Acupuncture | Sanyinjiao (SP6), Xuehai (SP10), Qihai (CV6)                                                                                                                                  | Chinese | YES |
| Efficacy observation on acupuncture-moxibustion at Ciliao (BL 32) for primary dysmenorrhea due to cold-dampness                            | Sharla Cheung  | Journal of Acupuncture and Tuina Science                                | 2016 | Acupuncture | Guanyuan (CV4), Zhongji (CV3), Zusanli (ST36), Sanyinjiao (SP6), Diji (SP8)                                                                                                   | English | YES |
| Clinical Effect of Acupuncture plus Earthworm Plaster Cataplastm Point Application for Qi Stagnation and Blood Stasis Primary Dysmenorrhea | LIU Zhao-shi   | Maternal and Child Health Care of China                                 | 2016 | Acupuncture | Zhongji (CV3), Guanyuan (CV4), Qihai (CV6), Diji (SP8)                                                                                                                        | Chinese | YES |
| Therapeutic Effect of Acupuncture Combined with TCM Nursing for Primary Dysmenorrhea                                                       | JIANG Tao      | For all Health                                                          | 2016 | Acupuncture | Sanyinjiao (SP6), Diji (SP8), Zusanli (ST36)                                                                                                                                  | Chinese | YES |
| Efficacy of Syndrome Differentiated Acupuncture for Primary Dysmenorrhea                                                                   | ZHONG Chun-yi  | Shenzhen Journal of Integrated Traditional Chinese and Western Medicine | 2015 | Acupuncture | Qihai (CV6), Ciliao (BL32), Xuehai (SP10), Sanyinjiao (SP6), Shuidao (ST28), Zhongji (CV3), Diji (SP8)                                                                        | Chinese | YES |
| Efficacy of Li Yongfeng's Acupuncture for 30 Cases of Primary Dysmenorrhea                                                                 | JING Liu       | For all Health                                                          | 2015 | Acupuncture | Zhongji (CV3), Zusanli (ST36), Sanyinjiao (SP6), Hegu (LI4), Taichong (LR3), Yanglingquan (GB34), Xuehai (SP10)                                                               | Chinese | YES |

|                                                                                                                                                         |                 |                                                                |      |             |                                                                                                                                                                                                         |         |     |
|---------------------------------------------------------------------------------------------------------------------------------------------------------|-----------------|----------------------------------------------------------------|------|-------------|---------------------------------------------------------------------------------------------------------------------------------------------------------------------------------------------------------|---------|-----|
| Clinical Study of Analgesia Effect of Compatibility of Acupuncture on Guanyuan(CV4) and Sanyinjiao(SP6) Acupoints on Primary Dysmenorrhea               | Crystal Zheng   | Journal of Shandong University of Traditional Chinese Medicine | 2015 | Acupuncture | Guanyuan (CV4), Sanyinjiao (SP6)                                                                                                                                                                        | Chinese | YES |
| A clinical analysis of treating primary dysmenorrhea by acupuncture                                                                                     | LIU Jun-hong    | Clinical Journal of Chinese Medicine                           | 2015 | Acupuncture | Qugu (CV2), Ciliao (BL32)                                                                                                                                                                               | Chinese | YES |
| Immediate Analgesic Effect of Deep Acupuncture at Shangliao, Ciliao, Zhongliao and Xialiao for 42 Cases of Primary Dysmenorrhea                         | ZHOU Guang-ming | Zhejiang Journal of Traditional Chinese Medicine               | 2015 | Acupuncture | Shangliao (BL31), Ciliao (BL32), Zhongliao (BL33), Xialiao (BL34)                                                                                                                                       | Chinese | NO  |
| 32 Cases of Cold Coagulation and Blood Stasis Primary Dysmenorrhea Treated by Wenjing Fuyang Decoction plus Acupuncture                                 | HOU Guang-yun   | Chinese Journal of Traditional Medical Science and Technology  | 2015 | Acupuncture | Zhongji (CV3), Shuidao (ST28), Diji (SP8)                                                                                                                                                               | Chinese | YES |
| The clinical efficacy of the Yao medicine pick needle therapy curing Primary dysmenorrhea                                                               | LIN Chen        | Journal of Li-shizhen Traditional Chinese Medicine             | 2015 | Acupuncture | Shangliao (BL31), Ciliao (BL32), Zhongliao (BL33), Xialiao (BL34), Sanyinjiao (SP6)                                                                                                                     | Chinese | YES |
| Comparative Study on the Real-time Analgesic Effect of Acupuncture at Diji (SP8) Versus Acupuncture at Diji and Guanyuan (CV4) for Primary Dysmenorrhea | Courteny        | Shanghai Journal of Acupuncture and Moxibustion                | 2015 | Acupuncture | Diji (SP8), Guanyuan (CV4)                                                                                                                                                                              | Chinese | YES |
| Clinical Study on Secretion-Regulating Acupuncture for Primary Dysmenorrhea                                                                             | ZHENG Jie       | Journal of Practical Traditional Chinese Medicine              | 2015 | Acupuncture | Ciliao (BL32), Shiqizhui (EX-B8), Diji (SP8), Sanyinjiao (SP6), Hegu (LI4), Zhongwan (CV12), Tianshu (ST25), Yinjiao (CV7), Guanyuan (CV4), Zhongji (CV3), Guilai (ST29), Xuehai (SP10), Taichong (LR3) | Chinese | YES |
| Therapeutic Observation of Acupuncture plus Auricular Point Sticking for Primary Dysmenorrhea                                                           | DENG Xia        | Shanghai Journal of Acupuncture and Moxibustion                | 2015 | Acupuncture | Sanyinjiao (SP6), Zusanli (ST36), Guanyuan (CV4)                                                                                                                                                        | Chinese | NO  |

|                                                                                                                                     |                  |                                                     |      |             |                                                                                                           |         |     |
|-------------------------------------------------------------------------------------------------------------------------------------|------------------|-----------------------------------------------------|------|-------------|-----------------------------------------------------------------------------------------------------------|---------|-----|
| Clinical Study on the Real-time Analgesic Effect of Acupuncture at Sanyinjiao (SP6) Versus Multiple Points for Primary Dysmenorrhea | SUN Ming-sheng   | Shanghai Journal of Acupuncture and Moxibustion     | 2015 | Acupuncture | Sanyinjiao (SP6), Guanyuan (CV4)                                                                          | Chinese | NO  |
| Clinical Observation on Acupuncture at Shiqizhui (EX-B8) plus Subcutaneous Embedding Acupuncture for Dysmenorrhea                   | XIONG Guang-ming | Shanxi Journal of Traditional Chinese Medicine      | 2015 | Acupuncture | Zhongji (CV3), Ciliao (BL32), Sanyinjiao (SP6), Guilai (ST29), Diji (SP8)                                 | Chinese | YES |
| The Acupuncture in the Treatment of Primary Dysmenorrhea for 30 Cases                                                               | TANG Xiao-min    | Chinese Medicine Modern Distance Education of China | 2015 | Acupuncture | Sanyinjiao (SP6), Diji (SP8), Guanyuan (CV4), Hegu (LI4)                                                  | Chinese | YES |
| Clinical observation on treating 45 cases of primary dysmenorrhea by acupuncture                                                    | NING Ying        | Clinical Journal of Chinese Medicine                | 2015 | Acupuncture | Ciliao (BL32), Sanyinjiao (SP6), Guanyuan (CV4)                                                           | Chinese | YES |
| Clinical Research of Acupuncture in the Treatment of Primary Dysmenorrhea                                                           | YANG Lu          | Acta Chinese Medicine                               | 2015 | Acupuncture | Zigong (EX-CA1), Guanyuan (CV4), Zhongji (CV3), Qugu (CV2), Yinlingquan (SP9)                             | Chinese | YES |
| Clinical Effect of Acupuncture Combined with TCM Nursing for Primary Dysmenorrhea                                                   | SUN Zhen-ying    | China Journal of Pharmaceutical Economics           | 2015 | Acupuncture | Sanyinjiao (SP6), Diji (SP8), Zusanli (ST36)                                                              | Chinese | NO  |
| Clinical observation on treating 45 cases of primary dysmenorrhea by acupuncture                                                    | ZHANG Zhi-yu     | Clinical Journal of Chinese Medicine                | 2015 | Acupuncture | Zhongji (CV3), Shuidao (ST28), Diji (SP8), Yinlingquan (SP9)                                              | Chinese | YES |
| Therapeutic Observation of Triple Acupuncture at Zhongji (CV 3) plus Mild Moxibustion for Primary Dysmenorrhea                      | Baby Face Lu     | Shanghai Journal of Acupuncture and Moxibustion     | 2014 | Acupuncture | Zhongji (CV3), Sanyinjiao (SP6), Diji (SP8), Shiqizhui (EX-B8), Hegu (LI4), Taichong (LR3), Ciliao (BL32) | Chinese | YES |
| Clinical Study on Zang-Fu Tuina Manipulation for Dysmenorrhea                                                                       | HE Xia           | Modern Diagnosis and Treatment                      | 2014 | Acupuncture | Guanyuan (CV4), Sanyinjiao (SP6), Hegu (LI4), Qihai (CV6), Taichong (LR3), Geshu (BL17)                   | Chinese | YES |
| Clinical Efficacy of Acupuncture and Moxibustion for Primary Dysmenorrhea                                                           | ZHANG Su-rong    | Chinese Journal of Clinical Rational Drug Use       | 2014 | Acupuncture | Sanyinjiao (SP6), Zhongji (CV3), Zigong (EX-CA1), Shuidao (ST28), Diji (SP8)                              | Chinese | YES |

|                                                                                                                                                   |               |                                                       |      |             |                                                                                                                           |         |     |
|---------------------------------------------------------------------------------------------------------------------------------------------------|---------------|-------------------------------------------------------|------|-------------|---------------------------------------------------------------------------------------------------------------------------|---------|-----|
| Clinical Observations on Premenstrual Acupuncture for Improving Symptoms Accompanying Primary Dysmenorrhea                                        | YU Chuan      | Shanghai Journal of Acupuncture and Moxibustion       | 2014 | Acupuncture | Yinjiao (CV7), Guanyuan (CV4), Zhongji (CV3), Dahe (KI12), Ciliao (BL32), Sanyinjiao (SP6), Taichong (LR3), Xuehai (SP10) | Chinese | YES |
| Clinical Observation on Moxibustion plus Point Injection for 60 Cases of Primary Dysmenorrhea                                                     | WU Qun        | Hubei Journal of Traditional Chinese Medicine         | 2014 | Acupuncture | Sanyinjiao (SP6), Ciliao (BL32), Diji (SP8), Xuehai (SP10), Taichong (LR3)                                                | Chinese | YES |
| Clinical Efficacy of Korean Saecam Acupuncture for Dysmenorrhea in Shaoyang Constitution Patients                                                 | CUI Song-yuan | Journal of Medicine & Pharmacy of Chinese Minorities  | 2014 | Acupuncture | Jingqu (LU8), Fulu (KI7), Taibai (SP3), Taixi (KI3)                                                                       | Chinese | YES |
| Analysis on the Relationship between Uterine Position and Acupoints Time Effect Based on Primary Dysmenorrhea                                     | XIN Si-yuan   | Journal of Clinical Acupuncture and Moxibustion       | 2014 | Acupuncture | Sanyinjiao (SP6), Xuanzhong (GB39)                                                                                        | Chinese | YES |
| Effect of Two Acupuncture Methods on Immediate Analgesia of Primary Dysmenorrhea                                                                  | LI De-ping    | Journal of Emergency in Traditional Chinese Medicine  | 2014 | Acupuncture | Guanyuan (CV4), Sanyinjiao (SP6), Diji (SP8), Shiqizhui (EX-B8)                                                           | Chinese | NO  |
| Clinical effective comparison on treating primary dysmenorrhea by Yao medicine pick needle therapy and Zhuang medicine thread moxibustion therapy | FAN Xiao-ting | Clinical Journal of Chinese Medicine                  | 2014 | Acupuncture | Shangliao (BL31), Ciliao (BL32), Zhongliao (BL33), Xialiao (BL34), Sanyinjiao (SP6)                                       | Chinese | NO  |
| Efficacy of Acupuncture Combined with TCM Nursing for Primary Dysmenorrhea                                                                        | GAO Xin-yue   | Chinese Journal of Clinical Rational Drug Use         | 2014 | Acupuncture | Zusanli (ST36), Diji (SP8), Sanyinjiao (SP6)                                                                              | Chinese | NO  |
| Clinical observation on preventive treatment of primary dysmenorrhea with acupuncture of regulating Qi and relieving pain                         | XUE Li-wen    | International Journal of Traditional Chinese Medicine | 2014 | Acupuncture | Lieque (LU7), Fenglong (ST40), Ligou (LR5)                                                                                | Chinese | YES |
| Clinical Study on Acupuncture for Primary Dysmenorrhea                                                                                            | QIAN Yu-xin   | Clinical Journal of Traditional Chinese Medicine      | 2013 | Acupuncture | Sanyinjiao (SP6), Zhongji (CV3), Ciliao (BL32), Guilai (ST29), Diji (SP8)                                                 | Chinese | NO  |

|                                                                                                                                   |              |                                                                |      |             |                                                                                                                           |         |     |
|-----------------------------------------------------------------------------------------------------------------------------------|--------------|----------------------------------------------------------------|------|-------------|---------------------------------------------------------------------------------------------------------------------------|---------|-----|
| Cinical obsevation on treating primary dysmenorrhea with acupuncture                                                              | LI Hua-xin   | Clinical Journal of Chinese Medicine                           | 2013 | Acupuncture | Guanyuan (CV4), Sanyinjiao (SP6), Qihai (CV6), Zhongji (CV3), Daimai (GB26)                                               | Chinese | YES |
| Efficacy of Acupuncture plus Moxibustion for 30 Cases of Primary Dysmenorrhea                                                     | YAN Shu-jun  | Journal of Frontiers of Medicine                               | 2013 | Acupuncture | Sanyinjiao (SP6), Zusanli (ST36), Zhongji (CV3), Guanyuan (CV4), Tianshu (ST25), Shuidao (ST28), Diji (SP8)               | Chinese | YES |
| Time-effect study on instant analgesic effect of the dragon-tiger fighting needling method on primary dysmenorrhea                | HU You-ping  | Chinese Acupuncture & Moxibustion                              | 2013 | Acupuncture | Sanyinjiao (SP6), Guanyuan (CV4), Diji (SP8), Shuidao (ST28), Zhongji (CV3)                                               | Chinese | YES |
| Efficacy of Pre-menstrual Acupuncture Intervention for Primary Dysmenorrhea                                                       | XU Shi-wen   | Chinese Journal of Information on Traditional Chinese Medicine | 2013 | Acupuncture | Yinjiao (CV7), Guanyuan (CV4), Zhongji (CV3), Dahe (KI12), Ciliao (BL32), Sanyinjiao (SP6), Taichong (LR3), Xuehai (SP10) | Chinese | NO  |
| 60 Cases of Primary Dysmenorrhea Treated by Acupuncture and Moxibustion                                                           | JI Bing-wu   | Guangming Journal of Chinese Medicine                          | 2013 | Acupuncture | Ciliao (BL32), Diji (SP8), Yinlingquan (SP9), Sanyinjiao (SP6), Shuidao (ST28), Guanyuan (CV4)                            | Chinese | YES |
| Clinical Study on Different Intervention Times of Acupuncture for Primary Dysmenorrhea                                            | AN Ying      | Shanghai Journal of Acupuncture and Moxibustion                | 2013 | Acupuncture | Sanyinjiao (SP6), Ciliao (BL32), Diji (SP8), Shiqizhui (EX-B8)                                                            | Chinese | NO  |
| 40 Cases of Primary Dysmenorrhea Treated by Abdominal Acupuncture plus TDP Irradiation                                            | KE Ling-ling | Journal of Practical Traditional Chinese Medicine              | 2013 | Acupuncture | Guanyuan (CV4), Sanyinjiao (SP6), Tianshu (ST25), Hegu (LI4), Shenshu (BL23)                                              | Chinese | YES |
| Effect of Pre-menstrual Single/Multi-point Acupuncture on Extra Bed Rest and Combined Medication in Primary Dysmenorrhea Patients | LI Zhao-feng | Journal of Clinical Acupuncture and Moxibustion                | 2013 | Acupuncture | Shiqizhui (EX-B8), Ciliao (BL32), Diji (SP8), Sanyinjiao (SP6)                                                            | Chinese | NO  |
| Observation on warming and freeing method in treating primary dysmenorrhea                                                        | FENG Hui     | Shanghai Journal of Traditional Chinese Medicine               | 2013 | Acupuncture | Guanyuan (CV4), Sanyinjiao (SP6), Taichong (LR3), Diji (SP8), Hegu (LI4), Zigong (EX-CA1)                                 | Chinese | YES |

|                                                                                                                        |                  |                                                                |      |             |                                                                                                |         |     |
|------------------------------------------------------------------------------------------------------------------------|------------------|----------------------------------------------------------------|------|-------------|------------------------------------------------------------------------------------------------|---------|-----|
| Analgesic effect of puncturing different acupoints in patients with primary dysmenorrhea                               | QIN Yan          | Journal of Shandong University of Traditional Chinese Medicine | 2013 | Acupuncture | Shiqizhui (EX-B8), Ciliao (BL32), Diji (SP8), Sanyinjiao (SP6)                                 | Chinese | NO  |
| Clinical Study on the Analgesic Effect of Needling Different Acupoints for Patients with Moderate Primary Dysmenorrhea | ZHU De-you       | Shanghai Journal of Acupuncture and Moxibustion                | 2013 | Acupuncture | Sanyinjiao (SP6), Ciliao (BL32), Diji (SP8), Shiqizhui (EX-B8)                                 | Chinese | NO  |
| Comparison of Immediate Analgesic Effect of Acupuncture at Different Points for Moderate Primary Dysmenorrhea          | ZHANG Lei        | Jiangsu Journal of Traditional Chinese Medicine                | 2013 | Acupuncture | Shiqizhui (EX-B8), Ciliao (BL32), Diji (SP8), Sanyinjiao (SP6)                                 | Chinese | NO  |
| Pain Relieving Effect in the Treatment of Severe Primary Dysmenorrhea by Pricking Single-Point and Multi-Point         | MA Yu-xia        | Journal of Clinical Acupuncture and Moxibustion                | 2013 | Acupuncture | Shiqizhui (EX-B8), Ciliao (BL32), Diji (SP8), Sanyinjiao (SP6)                                 | Chinese | NO  |
| Study of analgesic effect of acupuncture on patients with moderate and severe primary dysmenorrhea                     | MA Yu-xia        | Journal of Shandong University of Traditional Chinese Medicine | 2013 | Acupuncture | Shiqizhui (EX-B8), Diji (SP8), Sanyinjiao (SP6), Ciliao (BL32)                                 | Chinese | NO  |
| Analgesic Efficacy of Shiqizhui (EX-B8) and Multi-point Acupuncture for Dysmenorrhea                                   | TAN Ming-fang    | The Chinese and foreign health abstract                        | 2012 | Acupuncture | Zusanli (ST36), Sanyinjiao (SP6), Zhongji (CV3), Guanyuan (CV4), Qihai (CV6), Shenshu (BL23)   | Chinese | YES |
| Catgut Implantation at Acupoint Treat Primary Dysmenorrhea                                                             | WEN Chen         | Journal of Zhejiang Chinese Medical University                 | 2012 | Acupuncture | Guanyuan (CV4), Sanyinjiao (SP6), Diji (SP8), Shiqizhui (EX-B8), Shuidao (ST28)                | Chinese | NO  |
| Clinical Efficacy of Acupuncture and Moxibustion for 33 Cases of Primary Dysmenorrhea                                  | JIANG Rui-ke     | The Chinese and foreign health abstract                        | 2012 | Acupuncture | Zhongji (CV3), Guanyuan (CV4), Zusanli (ST36), Sanyinjiao (SP6), Taichong (LR3), Xuehai (SP10) | Chinese | YES |
| Acupuncture Effect on Hemorheological Indexes in Patients with Primary Dysmenorrhea                                    | ZHANG Zhou-liang | Chinese Journal of Hemorheology                                | 2012 | Acupuncture | Sanyinjiao (SP6), Xuehai (SP10), Ciliao (BL32), Chengshan (BL57), Zusanli (ST36)               | Chinese | YES |
| Analgesic Effect of Single Acupuncture at Shiqizhui (EX-B8) for Primary Dysmenorrhea                                   | ZHANG Lei        | Journal of Changchun University of Chinese Medicine            | 2012 | Acupuncture | Shiqizhui (EX-B8), Sanyinjiao (SP6), Ciliao (BL32), Diji (SP8)                                 | Chinese | NO  |

|                                                                                                                  |              |                                                      |      |             |                                                                                                             |         |     |
|------------------------------------------------------------------------------------------------------------------|--------------|------------------------------------------------------|------|-------------|-------------------------------------------------------------------------------------------------------------|---------|-----|
| Immediate Analgesic Effect of Acupuncture for Moderate Primary Dysmenorrhea                                      | LI Shu-jing  | Jilin Journal of Chinese Medicine                    | 2012 | Acupuncture | Shiqizhui (EX-B8), Diji (SP8), Sanyinjiao (SP6), Ciliao (BL32)                                              | Chinese | NO  |
| Observation on Pain Relieving Effect in the Treatment of Severe Primary Dysmenorrhea by needling                 | XIE Xiao-jia | Jilin Journal of Chinese Medicine                    | 2012 | Acupuncture | Shiqizhui (EX-B8), Diji (SP8), Sanyinjiao (SP6), Ciliao (BL32)                                              | Chinese | NO  |
| Emergency Analgesic Effect of Acupuncture for Moderate Primary Dysmenorrhea                                      | YAO Wei      | Fujian Journal of Traditional Chinese Medicine       | 2012 | Acupuncture | Zhongji (CV3), Sanyinjiao (SP6), Zigong (EX-CA1), Ciliao (BL32), Diji (SP8), Hegu (LI4)                     | Chinese | YES |
| Clinical Observation on Acupuncture and Moxibustion for Primary Dysmenorrhea                                     | SHEN Yi      | Journal of Changzhi Medical College                  | 2011 | Acupuncture | Zhongji (CV3), Sanyinjiao (SP6), Zigong (EX-CA1), Diji (SP8), Taichong (LR3), Guilai (ST29)                 | Chinese | YES |
| The Effects of Deqi and Manual Acupuncture Needle Manipulation on the Clinical Outcomes of Acupuncture Analgesia | XIONG Jin    | Liaoning Journal of Traditional Chinese Medicine     | 2011 | Acupuncture | Zusanli (ST36), Sanyinjiao (SP6), Zhongji (CV3), Guanyuan (CV4), Qihai (CV6)                                | Chinese | YES |
| Treatment of 30 cases of primary dysmenorrhea by needling Diji ( SP8 )                                           | LIU Xi-ru    | Shanghai Journal of Traditional Chinese Medicine     | 2011 | Acupuncture | Diji (SP8), Sanyinjiao (SP6)                                                                                | Chinese | NO  |
| Clinical observation of effect of acupuncture combined with herb fire treatment for primary dysmenorrhea         | PENG Xin-yi  | Medical Journal of West China                        | 2011 | Acupuncture | Zigong (EX-CA1), Guanyuan (CV4), Sanyinjiao (SP6), Shenshu (BL23)                                           | Chinese | YES |
| Healing effect observation on treatment of primary dysmenorrhea with acupuncture                                 | ZHAO Zhi-lan | Heilongjiang Journal of Traditional Chinese Medicine | 2011 | Acupuncture | Guanyuan (CV4), Zhongji (CV3), Zigong (EX-CA1), Diji (SP8), Sanyinjiao (SP6), Taichong (LR3), Xuehai (SP10) | Chinese | YES |
| 46 Cases of Primary Dysmenorrhea Treated by Syndrome Differentiated Acupuncture                                  | CHEN Xing    | Hubei Journal of Traditional Chinese Medicine        | 2011 | Acupuncture | Ciliao (BL32), Xuehai (SP10), Qihai (CV6), Sanyinjiao (SP6), Zhongji (CV3), Shuidao (ST28), Diji (SP8)      | Chinese | NO  |

|                                                                                                                                                                                                                                 |                |                                                               |      |             |                                                                                                                                                                           |         |     |
|---------------------------------------------------------------------------------------------------------------------------------------------------------------------------------------------------------------------------------|----------------|---------------------------------------------------------------|------|-------------|---------------------------------------------------------------------------------------------------------------------------------------------------------------------------|---------|-----|
| Moxibustion Combined with Acupuncture in the Treatment of Primary Dysmenorrhea:An Analysis of 34 Cases                                                                                                                          | ZHAO Jing-jun  | Journal of Clinical Acupuncture and Moxibustion               | 2011 | Acupuncture | Guanyuan (CV4), Sanyinjiao (SP6), Diji (SP8), Guilai (ST29), Shenshu (BL23), Ciliao (BL32)                                                                                | Chinese | YES |
| Clinical Observation on Feijing Zouqi Acupuncture for 46 Cases of Qi Stagnation and Blood Stasis Primary Dysmenorrhea                                                                                                           | LI Gang        | Journal of Chengdu University of Traditional Chinese Medicine | 2011 | Acupuncture | Ciliao (BL32), Yaoyangguan (GV3), Dachangshu (BL25), Guilai (ST29), Diji (SP8), Sanyinjiao (SP6), Guanyuan (CV4), Xuehai (SP10), Hegu (LI4), Taichong (LR3), Qimen (LR14) | Chinese | YES |
| Observation on immediate analgesic effect of acupuncture at Shiqizhui (EX-B 8) only or multi-acupoints in patients with dysmenorrhea: a randomized controlled trial                                                             | LI Yan-mei     | Chinese Acupuncture & Moxibustion                             | 2011 | Acupuncture | Shiqizhui (EX-B8), Sanyinjiao (SP6), Diji (SP8), Ciliao (BL32)                                                                                                            | Chinese | NO  |
| Efficacy of Prophylactic Single/Multi-point Acupuncture for Primary Dysmenorrhea                                                                                                                                                | BU Yan-qing    | New Chinese Medicine                                          | 2011 | Acupuncture | Sanyinjiao (SP6), Ciliao (BL32), Diji (SP8), Shiqizhui (EX-B8)                                                                                                            | Chinese | NO  |
| Preliminary Comparison on Time - Effect Rule of Pain - Relieving in The Treatment of Mild Dysmenorrhea between Acupuncture of Single Point and Acupuncture of Multipoint                                                        | CHEN Shao-zong | Liaoning Journal of Traditional Chinese Medicine              | 2011 | Acupuncture | Shiqizhui (EX-B8), Diji (SP8), Ciliao (BL32), Sanyinjiao (SP6)                                                                                                            | Chinese | NO  |
| Preliminary Comparison on Time - Effect Rule of Pain - Relieving in The Treatment of Moderate and severe Dysmenorrhea between Acupuncture of Single Point and Acupuncture of Multipoint                                         | CHEN Shao-zong | Liaoning Journal of Traditional Chinese Medicine              | 2011 | Acupuncture | Shiqizhui (EX-B8), Diji (SP8), Ciliao (BL32), Sanyinjiao (SP6)                                                                                                            | Chinese | NO  |
| Preliminary Comparison on the Role of Pain - Relieving in the Treatment of Mild and Moderate Dysmenorrhea between Acupuncture of Single Point and Acupuncture of Multipoints——The Importance of Prescription Acupoints Rule(VI) | CHEN Shao-zong | Journal of Clinical Acupuncture and Moxibustion               | 2011 | Acupuncture | Shiqizhui (EX-B8), Ciliao (BL32), Diji (SP8), Sanyinjiao (SP6)                                                                                                            | Chinese | NO  |
| Preliminary comparison on the time-effect rule of pain-relieving in the treatment of moderate dysmenorrhea between acupuncture on single-point and acupuncture on multi-point                                                   | CHEN Shao-zong | Chinese Acupuncture & Moxibustion                             | 2011 | Acupuncture | Shiqizhui (EX-B8), Diji (SP8), Ciliao (BL32), Sanyinjiao (SP6)                                                                                                            | Chinese | NO  |

|                                                                                                                      |                            |                                                                |      |             |                                                                                         |         |     |
|----------------------------------------------------------------------------------------------------------------------|----------------------------|----------------------------------------------------------------|------|-------------|-----------------------------------------------------------------------------------------|---------|-----|
| 41 Cases of Primary Dysmenorrhea Treated by Acupuncture plus Acupoint Microwave Irradiation                          | CHANG Xue-li               | HENAN ZHONGYI                                                  | 2011 | Acupuncture | Sanyinjiao (SP6), Zhongji (CV3), Ciliao (BL32)                                          | Chinese | YES |
| Acupuncture plus External Chinese Medicine Application for Cold Coagulation and Blood Stasis Primary Dysmenorrhea    | HOU Guang-yun              | Journal of Clinical Acupuncture and Moxibustion                | 2011 | Acupuncture | Qihai (CV6), Guanyuan (CV4), Yinlingquan (SP9), Sanyinjiao (SP6)                        | Chinese | YES |
| Instant effect of acupuncture at Suliáo ( GV 25) mainly for primary dysmenorrhea                                     | CHEN Miao-ling             | WorldJournalofAcupuncture -Moxibustion                         | 2011 | Acupuncture | Suliao (GV25), Zusanli (ST36), Sanyinjiao (SP6), Dachangshu (BL25), Ciliao (BL32)       | English | YES |
| 68 Cases of Functional Dysmenorrhea Treated by Acupuncture                                                           | YUAN Yun-xia               | Shanghai Journal of Acupuncture and Moxibustion                | 2011 | Acupuncture | Zhongji (CV3), Guanyuan (CV4), Zusanli (ST36), Sanyinjiao (SP6)                         | Chinese | YES |
| Clinical Study on Time-effect Relation of Acupuncture for Pain due to Dysmenorrhea                                   | CHEN Shao-zong             | Journal of Acupuncture and Tuina Science                       | 2011 | Acupuncture | Ciliao (BL32), Dijì (SP8), Sanyinjiao (SP6), Shiqizhui (EX-B8)                          | English | NO  |
| 15 Cases of Primary Dysmenorrhea Treated by Acupuncture                                                              | HUANG Hui-ling             | Journal of Changchun University of Chinese Medicine            | 2011 | Acupuncture | Neiguan (PC6), Gongsun (SP4), Tianshu (ST25), Zhongji (CV3), Dijì (SP8), Zusanli (ST36) | Chinese | YES |
| Efficacy of Acupuncture for 40 Cases of Primary Dysmenorrhea                                                         | JIANG Hong-yun             | Journal of Gansu University of Chinese Medicine                | 2011 | Acupuncture | Hegu (LI4), Tianshu (ST25), Qichong (ST30), Sanyinjiao (SP6), Zhongji (CV3)             | Chinese | YES |
| Acupuncture for Primary Dysmenorrhea:A Randomized Controlled Trial                                                   | mass/deploy/station troops | Journal of Acupuncture and Tuina Science                       | 2011 | Acupuncture | Sanyinjiao (SP6), Dijì (SP8), Xuehai (SP10), Hegu (LI4)                                 | English | YES |
| Analgesic effects of primary dysmenorrhea treated with acupuncture                                                   | CONG Qian                  | Journal of Shandong University of Traditional Chinese Medicine | 2011 | Acupuncture | Shiqizhui (EX-B8), Sanyinjiao (SP6), Ciliao (BL32), Dijì (SP8)                          | Chinese | NO  |
| Heat-inducing Acupuncture at Zhongji (CV3) plus Four Gates Points for Cold Coagulation and Blood Stasis Dysmenorrhea | Gavin Lee                  | China's Naturopathy                                            | 2011 | Acupuncture | Zhongji (CV3), Hegu (LI4), Taichong (LR3)                                               | Chinese | YES |

|                                                                                                                                                                              |                |                                                  |      |             |                                                                                                             |         |     |
|------------------------------------------------------------------------------------------------------------------------------------------------------------------------------|----------------|--------------------------------------------------|------|-------------|-------------------------------------------------------------------------------------------------------------|---------|-----|
| Clinical Observation on Cyclic Sequential Acupuncture for 43 Cases of Cold Dampness Stagnation Primary Dysmenorrhea                                                          | MA Rui         | Jiangsu Journal of Traditional Chinese Medicine  | 2011 | Acupuncture | Guanyuan (CV4), Qihai (CV6), Sanyinjiao (SP6)                                                               | Chinese | YES |
| The Clinical Observation of the Acupuncture Treatment for Primary Dysmenorrheal 50 Cases                                                                                     | FU Lei         | Journal of Clinical Acupuncture and Moxibustion  | 2010 | Acupuncture | Sanyinjiao (SP6), Zigong (EX-CA1), Zusanli (ST36), Guanyuan (CV4), Taichong (LR3), Diji (SP8)               | Chinese | YES |
| 60 Cases of Primary Dysmenorrhea Treated by Acupuncture at Jueyin Meridian Alone                                                                                             | WANG Guo-jian  | Jilin Journal of Chinese Medicine                | 2010 | Acupuncture | Xingjian (LR2), Taichong (LR3), Neiguan (PC6), Jianshi (PC5)                                                | Chinese | YES |
| Study on influence of health education on analgesic effects of acupuncture treatment for patients with primary dysmenorrheal                                                 | HOU Wen-jing   | Chinese Nursing Research                         | 2010 | Acupuncture | Sanyinjiao (SP6), Ciliao (BL32), Diji (SP8), Shiqizhui (EX-B8)                                              | Chinese | NO  |
| 43 Cases of Primary Dysmenorrhea Treated by Warm Acupuncture plus Guipi Pill                                                                                                 | LIU Yan-feng   | Shandong Journal of Traditional Chinese Medicine | 2010 | Acupuncture | Hegu (LI4), Sanyinjiao (SP6), Diji (SP8)                                                                    | Chinese | YES |
| Clinical Efficacy of Point-selected Acupuncture for 31 Cases of Primary Dysmenorrhea                                                                                         | HOU Wen-jing   | shandong Medical Journal                         | 2010 | Acupuncture | Sanyinjiao (SP6), Ciliao (BL32), Diji (SP8), Shiqizhui (EX-B8)                                              | Chinese | NO  |
| Clinical Observation on Acupuncture Mainly at Ciliao (BL32) for Primary Dysmenorrhea                                                                                         | YE Xiu-ying    | Hubei Journal of Traditional Chinese Medicine    | 2010 | Acupuncture | Ciliao (BL32), Qihai (CV6), Guanyuan (CV4), Tianshu (ST25), Xuehai (SP10), Zusanli (ST36), Sanyinjiao (SP6) | Chinese | YES |
| Comparison on Immediate Analgesic Effect in Patients with Primary Dysmenorrhea between Acupuncture of Single Point and Several Points                                        | CHEN Shao-zong | Journal of Clinical Acupuncture and Moxibustion  | 2010 | Acupuncture | Shiqizhui (EX-B8), Diji (SP8), Ciliao (BL32), Sanyinjiao (SP6)                                              | Chinese | NO  |
| Comparison on the Analgesic Action of the Time-effect Regularity in Patients with Primary Dysmenorrhea Between Acupuncture of Single Point and Acupuncture of Several Points | CHEN Shao-zong | Liaoning Journal of Traditional Chinese Medicine | 2010 | Acupuncture | Shiqizhui (EX-B8), Diji (SP8), Ciliao (BL32), Sanyinjiao (SP6)                                              | Chinese | NO  |

|                                                                                                                         |                 |                                                             |      |             |                                                                                         |         |     |
|-------------------------------------------------------------------------------------------------------------------------|-----------------|-------------------------------------------------------------|------|-------------|-----------------------------------------------------------------------------------------|---------|-----|
| Clinical Observation on Acupuncture and Moxibustion for 45 Cases of Primary Dysmenorrhea                                | CHEN Yu-hua     | Chinese Journal of Ethnomedicine and Ethnopharmacy          | 2010 | Acupuncture | Ciliao (BL32), Diji (SP8), Sanyinjiao (SP6), Guanyuan (CV4), Xuehai (SP10)              | Chinese | YES |
| Treating 65 cases of primary dysmenorrhea by Tianshu,Guanyuan acupuncture point                                         | AI Ji-nen       | Clinical Journal of Chinese Medicine                        | 2010 | Acupuncture | Tianshu (ST25), Guanyuan (CV4), Sanyinjiao (SP6)                                        | Chinese | YES |
| Clinical Study on Single/Multi-point Acupuncture for Primary Dysmenorrhea                                               | MA Yu-xia       | Shandong Journal of Traditional Chinese Medicine            | 2009 | Acupuncture | Sanyinjiao (SP6), Ciliao (BL32), Diji (SP8), Shiqizhui (EX-B8)                          | Chinese | NO  |
| 47 Cases of Primary Dysmenorrhea Treated by Acupuncture                                                                 | JUAN Li         | Journal of External Therapy of Traditional Chinese Medicine | 2009 | Acupuncture | Xuehai (SP10), Zusanli (ST36), Sanyinjiao (SP6), Neiguan (PC6)                          | Chinese | YES |
| Observations on the Efficacy of Acupuncture Plus Point Application in Treating Primary Dysmenorrheal                    | ZHENG Zhao-jian | Shanghai Journal of Acupuncture and Moxibustion             | 2009 | Acupuncture | Taichong (LR3), Sanyinjiao (SP6), Diji (SP8), Qihai (CV6)                               | Chinese | YES |
| Preliminary Observation on Analgesic Effect's Time-effectiveness Rule of Acupuncture Sanyinjiao to Primary Dysmenorrhea | CHEN Shao-zong  | Journal of Clinical Acupuncture and Moxibustion             | 2009 | Acupuncture | Sanyinjiao (SP6), Diji (SP8), Ciliao (BL32), Shiqizhui (EX-B8)                          | Chinese | NO  |
| Efficacy of Syndrome Differentiated Acupuncture for 48 Cases of Primary Dysmenorrhea                                    | JIA Li-xin      | China & Foreign Medical Treatment                           | 2009 | Acupuncture | Qihai (CV6), Zhongji (CV3), Guilai (ST29), Sanyinjiao (SP6)                             | Chinese | YES |
| Observation on 35 Cases of Primary Dysmenorrhea Treated by Acupuncture                                                  | WANG Ying       | Journal of Practical Traditional Chinese Medicine           | 2008 | Acupuncture | Guanyuan (CV4), Sanyinjiao (SP6), Diji (SP8), Hegu (LI4), Taichong (LR3), Xuehai (SP10) | Chinese | YES |
| Acupuncture at Siguan points for treatment of primary dysmenorrhea                                                      | LI Cheng-hong   | Chinese Acupuncture & Moxibustion                           | 2008 | Acupuncture | Hegu (LI4), Taichong (LR3), Qihai (CV6), Neiguan (PC6)                                  | Chinese | YES |

|                                                                                                  |                 |                                                                |      |             |                                                                                                                                                                                |         |     |
|--------------------------------------------------------------------------------------------------|-----------------|----------------------------------------------------------------|------|-------------|--------------------------------------------------------------------------------------------------------------------------------------------------------------------------------|---------|-----|
| Primary Dysmenorrhea Treated by Ear-Acupuncture Combined with Body-Acupuncture                   | ZHANG Xiao-yang | Shaanxi Journal of Traditional Chinese Medicine                | 2008 | Acupuncture | Sanyinjiao (SP6), Guanyuan (CV4), Diji (SP8), Shiqizhui (EX-B8), Shuidao (ST28)                                                                                                | Chinese | NO  |
| Primary Dysmenorrhea Treated by Acupuncture Technique of "Mountain-Burning Fire"                 | CHEN Zhong-xin  | Shaanxi Journal of Traditional Chinese Medicine                | 2008 | Acupuncture | Guanyuan (CV4), Sanyinjiao (SP6), Diji (SP8)                                                                                                                                   | Chinese | NO  |
| Clinical Observation On Treatment of Primary Dysmenorrhea with Acupuncture and Massage           | LIN Li-li       | Chinese Journal of Integrated Traditional and Western Medicine | 2008 | Acupuncture | Sanyinjiao (SP6), Guanyuan (CV4), Diji (SP8)                                                                                                                                   | Chinese | NO  |
| Clinical Observasion of Acupuncture on Primary Dysmenorrhea                                      | LIU Bao-ying    | Journal of Shanxi University of Chinese Medicine               | 2007 | Acupuncture | Zhongji (CV3), Guanyuan (CV4), Zusanli (ST36), Sanyinjiao (SP6), Taichong (LR3)                                                                                                | Chinese | YES |
| Efficacy of Eight Methods of Intelligent Turtle for Primary Dysmenorrhea                         | XIE Gan-gong    | Chinese Acupuncture & Moxibustion                              | 2007 | Acupuncture | Zhongji (CV3), Qihai (CV6), Guanyuan (CV4), Sanyinjiao (SP6), Geshu (BL17), Pishu (BL20), Ganshu (BL18), Shenshu (BL23), Taichong (LR3), Diji (SP8), Qugu (CV2), Ciliao (BL32) | Chinese | NO  |
| Clinical Experience in Acupuncture for 34 Cases of Primary Dysmenorrhea                          | JIANG Li-yan    | Journal of Emergency in Traditional Chinese Medicine           | 2007 | Acupuncture | Shangliao (BL31), Ciliao (BL32), Zhongliao (BL33), Taichong (LR3), Sanyinjiao (SP6), Diji (SP8), Guanyuan (CV4), Zusanli (ST36)                                                | Chinese | YES |
| Clinical Observation on Acupuncture for Primary Dysmenorrhea                                     | WANG Wen-qing   | Hubei Journal of Traditional Chinese Medicine                  | 2007 | Acupuncture | Sanyinjiao (SP6), Diji (SP8), Xuehai (SP10), Hegu (LI4)                                                                                                                        | Chinese | NO  |
| Efficacy of Acupuncture and Moxibustion for 50 Female College Students with Primary Dysmenorrhea | YANG Yong-hong  | Chinese Journal of Convalescent Medicine                       | 2007 | Acupuncture | Guanyuan (CV4), Sanyinjiao (SP6), Diji (SP8), Shiqizhui (EX-B8), Shuiquan (KI5)                                                                                                | Chinese | YES |

|                                                                                                               |                       |                                                                       |      |             |                                                                                                           |         |     |
|---------------------------------------------------------------------------------------------------------------|-----------------------|-----------------------------------------------------------------------|------|-------------|-----------------------------------------------------------------------------------------------------------|---------|-----|
| Acupuncture and Moxibustion for Primary Adolescent Dysmenorrhea                                               | ZHAO Hui-ling         | Modern Journal of Integrated Traditional Chinese and Western Medicine | 2006 | Acupuncture | Zhiyin (BL67), Zhongji (CV3), Sanyinjiao (SP6), Taichong (LR3)                                            | Chinese | YES |
| 19 Cases of Functional Dysmenorrhea Treated by Acupuncture                                                    | BI Xin-hui            | Heilongjiang Journal of Traditional Chinese Medicine                  | 2005 | Acupuncture | Shuidao (ST28), Qihai (CV6), Sanyinjiao (SP6)                                                             | Chinese | YES |
| Clinical Observation on Acupuncture plus Warm Unblocking Ointment Tuina for 55 Cases of Primary Dysmenorrhea  | YIN Lun-hui           | Chinese Journal of Clinical Healthcare                                | 2005 | Acupuncture | Zhongji (CV3), Shuidao (ST28), Diji (SP8)                                                                 | Chinese | NO  |
| Clinical Study on Acupuncture for Primary Dysmenorrhea                                                        | HUANG Xiao-tao        | Chinese Journal of Physical Medicine and Rehabilitation               | 2004 | Acupuncture | Sanyinjiao (SP6), Diji (SP8)                                                                              | Chinese | NO  |
| Clinical Observation on Acupuncture Mainly at Ciliao (BL32) for Primary Dysmenorrhea                          | ZHOU Li-sha           | Hubei Journal of Traditional Chinese Medicine                         | 2003 | Acupuncture | Ciliao (BL32), Guanyuan (CV4)                                                                             | Chinese | YES |
| 39 Cases of Primary Dysmenorrhea Prevented and Treated by Acupuncture                                         | GUO Zhi-ping          | Shaanxi Journal of Traditional Chinese Medicine                       | 2003 | Acupuncture | Ciliao (BL32), Sanyinjiao (SP6), Zhongji (CV3), Shuidao (ST28), Diji (SP8)                                | Chinese | YES |
| Clinical study on primary dysmenorrhea treated with eight methods of intelligent turtle                       | Thank you for sharing | Journal of Clinical Acupuncture and Moxibustion                       | 2003 | Acupuncture | Zhongji (CV3), Ciliao (BL32), Diji (SP8)                                                                  | Chinese | YES |
| Clinical Observation on Front-Mu and Back-Shu Meridian Unblocking Method for 32 Cases of Primary Dysmenorrhea | ZHANG Miao            | Chinese Journal of Traditional Medical Science and Technology         | 2003 | Acupuncture | Pishu (BL20), Ganshu (BL18), Shenshu (BL23), Zhongji (CV3), Tianshu (ST25), Guanyuan (CV4), Baihui (GV20) | Chinese | YES |
| Acupuncture for Primary Dysmenorrhea                                                                          | HAN Jian-shu          | Journal of Aerospace Medicine                                         | 1999 | Acupuncture | Shangliao (BL31), Ciliao (BL32), Diji (SP8)                                                               | Chinese | YES |

|                                                                                |               |                                                                |      |             |                                              |         |     |
|--------------------------------------------------------------------------------|---------------|----------------------------------------------------------------|------|-------------|----------------------------------------------|---------|-----|
| 64 Cases of Primary Dysmenorrhea Treated by Acupuncture and Moxibustion        | XUE Ling      | Zhejiang Journal of Traditional Chinese Medicine               | 1998 | Acupuncture | Sanyinjiao (SP6), Taichong (LR3)             | Chinese | YES |
| 32 Cases of Functional Dysmenorrhea Treated by Four Acupoints around Umbilicus | WANG Guo-ming | Journal of Hebei Traditional Chinese Medicine and Pharmacology | 1995 | Acupuncture | Tianshu (ST25), Shuifen (CV9), Yinjiao (CV7) | Chinese | YES |

Supplementary Table 4 General Characteristics of Included Articles on Core Acupoints and Their Bioactive Substances

| Author        | Year | Title                                                                                                                                                                                                                      | Journal                                                       | Publication Language | Therapeutic Method | Acupoint                         | Active substance                            |
|---------------|------|----------------------------------------------------------------------------------------------------------------------------------------------------------------------------------------------------------------------------|---------------------------------------------------------------|----------------------|--------------------|----------------------------------|---------------------------------------------|
| Yu Wen-Yan    | 2022 | Acupuncture Alleviates Menstrual Pain in Rat Model via Suppressing Eotaxin/CCR3 Axis to Weak EOS-MC Activation                                                                                                             | Evidence-Based Complementary and Alternative Medicine         | English              | Acupuncture        | Sanyinjiao (SP6)                 | HIS, IL-6, CCR3, H1R, EPO, ECP              |
| TIAN Yuan     | 2022 | Effect of different acupuncture and moxibustion methods on uterine contraction and microcirculation in cold congealing dysmenorrhea rats                                                                                   | Acupuncture Research                                          | Chinese              | Acupuncture        | Sanyinjiao (SP6)                 | TRPV1                                       |
| XIE Hai-mei   | 2022 | Effects of Acupuncture Intensity on Analgesic Efficacy, Prostaglandin and Oxytocin Levels in a Dysmenorrhea-like Rat Model                                                                                                 | Journal of Traditional Chinese Medicine                       | Chinese              | Acupuncture        | Sanyinjiao (SP6)                 | PGF2a, PGE2, OT, Ca2+                       |
| GAN Ying-ying | 2021 | Effects of transverse and perpendicular needling at Sanyinjiao (SP6) on the uterine microcirculation and NO, NOS in cold congealing dysmenorrhea rats                                                                      | China Journal of Traditional Chinese Medicine and Pharmacy    | Chinese              | Acupuncture        | Sanyinjiao (SP6)                 | NO, NOS                                     |
| SONG Yue      | 2020 | Effects of perpendicular needling and transverse needling at Sanyinjiao (SP6) on oxytocin and its receptor in dysmenorrhea rats with cold stagnation syndrome                                                              | China Journal of Traditional Chinese Medicine and Pharmacy    | Chinese              | Acupuncture        | Sanyinjiao (SP6)                 | OT, OTR                                     |
| SONG Yue      | 2020 | Perpendicular and transverse needling of "Sanyinjiao" (SP6) relieves abdominal pain by regulating arginine vasopressin and its receptor expression levels in uterus and hypothalamus in cold-stasis type dysmenorrhea rats | Acupuncture Research                                          | Chinese              | Acupuncture        | Sanyinjiao (SP6)                 | AVP, AVPR1A, AVPR1B                         |
| LUO Li        | 2017 | Effect of acupuncture at guanyuan ( CV4) on skin temperature at bilateral sanyinjiao (SP6) and on TXB <sub>2</sub> /6-keto-PGF <sub>1α</sub> of dysmenorrhea rats with coagulation cold pattern"                           | Journal of Beijing University of Traditional Chinese Medicine | Chinese              | Acupuncture        | Guanyuan (CV4)                   | TXB <sub>2</sub> , 6-keto-PGF <sub>1α</sub> |
| YANG Jia-min  | 2017 | Effects of Acupuncture at Different Acupoints on Uterine Contraction Degree and Pain-Related Mechanisms in                                                                                                                 | Acta Chinese Medicine and Pharmacology                        | Chinese              | Acupuncture        | Sanyinjiao (SP6), Guanyuan (CV4) | MOR                                         |

|               |      |                                                                                                                                                                                                   |                                                               |         |             |                                              |                                            |
|---------------|------|---------------------------------------------------------------------------------------------------------------------------------------------------------------------------------------------------|---------------------------------------------------------------|---------|-------------|----------------------------------------------|--------------------------------------------|
|               |      | Dysmenorrhea-like Rats with Cold Coagulation Syndrome                                                                                                                                             |                                                               |         |             |                                              |                                            |
| CUI Xiao      | 2016 | The Comparative Study on Acupuncture with Moxibustion at "Sanyinjiao'(SP6)" on Dysmenorrheal Rats Model with Cold Syndrome                                                                        | Guiding Journal of Traditional Chinese Medicine and Pharmacy  | Chinese | Acupuncture | Sanyinjiao (SP6)                             | OTR                                        |
| WANG Yang     | 2016 | Effect of Acupuncture at Guanyuan (CV4) on Writhing Response and Vasomotor Substances in Rats with Dysmenorrhea Due to Coagulated Cold Syndrome                                                   | Shanghai Journal of Acupuncture and Moxibustion               | Chinese | Acupuncture | Guanyuan (CV4)                               | TXB2, 6-keto-PGF1a                         |
| Ma Yu-Xia     | 2015 | Research of Herb-Partitioned Moxibustion for Primary Dysmenorrhea Patients Based on the LC-MS Metabonomics                                                                                        | Evidence-Based Complementary and Alternative Medicine         | English | Acupuncture | Sanyinjiao (SP6)                             | 2-ME2, 20-OH-P, P5, 15-HETrE, 6-keto-PGF1a |
| QI Dan-dan    | 2015 | Effect of Different Acupuncture Stimulus on Writhing Response and Prostaglandin Content of Dysmenorrhea Rats with Cold Syndrome                                                                   | Information on Traditional Chinese Medicine                   | Chinese | Acupuncture | Sanyinjiao (SP6)                             | PGF2a, PGE2                                |
| XU Yong-si    | 2015 | Effects of acupuncture with different stimuli intensity on uterine contraction and expression of endocrinerelated molecular receptor genes in rats with dysmenorrhea of cold coagulation pattern" | Journal of Beijing University of Traditional Chinese Medicine | Chinese | Acupuncture | Sanyinjiao (SP6)                             | PGF2a, PGE2                                |
| Shi Guang-Xia | 2011 | Effects of acupuncture at Sanyinjiao (SP6) on prostaglandin levels in primary dysmenorrhea patients                                                                                               | The Clinical Journal of Pain                                  | English | Acupuncture | Sanyinjiao (SP6)                             | PGE2, PGF2a, TXB2, 6-keto-PGF1a            |
| LI Xiao-hong  | 2010 | Study of $\beta$ -EP content and HSP70 expression in hypothalamus and pituitary of dysmenorrhea rats with acupuncture on Sanyinjiao point at different time                                       | China Journal of Traditional Chinese Medicine and Pharmacy    | Chinese | Acupuncture | Sanyinjiao (SP6)                             | $\beta$ -EP                                |
| MA Zong-guo   | 2010 | Experimental Study on Acupuncture at Sanyinjiao (SP6) and Guanyuan (CV4) for Regulating Menstruation and Relieving Pain in Primary Dysmenorrhea                                                   | Journal of Sichuan of Traditional Chinese Medicine            | Chinese | Acupuncture | Sanyinjiao (SP6), Guanyuan (CV4)             | PGF2a                                      |
| LIU Fang      | 2009 | Study on the Underlying Mechanism of Acupuncture in Regulating Neuroendocrine Activity in Dysmenorrhea Rats                                                                                       | Acupuncture Research                                          | Chinese | Acupuncture | Guanyuan (CV4), Diji (SP8), Sanyinjiao (SP6) | FSH, E2, GnRH, GnRH-R                      |
| YANG Ya-qin   | 2008 | Study on effects of acupuncture on mice dysmenorrhea model and                                                                                                                                    | Chinese Acupuncture &                                         | Chinese | Acupuncture | Sanyinjiao (SP6), Diji                       | OTR                                        |

|         |      |                                                                                                    |                                                 |         |             |                                  |                      |
|---------|------|----------------------------------------------------------------------------------------------------|-------------------------------------------------|---------|-------------|----------------------------------|----------------------|
|         |      | the mechanism                                                                                      | Moxibustion                                     |         |             | (SP8)                            |                      |
| CHEN Yu | 2007 | The Effect of Acupuncture on Uterine NO and Ca <sup>2+</sup> Levels in a Rat Model of Dysmenorrhea | Journal of Clinical Acupuncture and Moxibustion | Chinese | Acupuncture | Sanyinjiao (SP6), Guanyuan (CV4) | NO, Ca <sup>2+</sup> |
